# Supplementary material for: Intermittent time-set technique controlling the temperature of magnetic-hyperthermia-ablation for tumor therapy
Source: Royal Society of Chemistry journal article supplement (doi:10.1039/c8ra01176a), 2018-01-01
Supplement: c8ra01176a2.pdf [file c8ra01176a2.pdf]

## Supporting Information

### Intermittent Time-Set Technique Controlling Temperature of Magnetic-Hyperthermia-Ablation for Tumor Therapy

Xiuzhen Tang<sup>a,b†</sup>, Yanjun Xu<sup>b†</sup>, Jie Chen<sup>b</sup>, Tao Ying<sup>b</sup>, Longchen Wang<sup>b</sup>, Lixin Jiang<sup>b</sup>, Yan Wang<sup>b</sup>, Zhenhai Wang<sup>c</sup>, Yi Ling<sup>a</sup>, Fengjuan Wang<sup>a</sup>, Li Yao<sup>b</sup>, Haitao Ran<sup>a</sup>, Zhigang Wang<sup>a</sup>, Bing Hu<sup>b\*</sup> and Yuanyi Zheng<sup>a,b\*</sup>

The liquid-solid phase transformation experiment, photographic images of blank control group nude mice and the 3D ultrasound images of implants *in vivo*.

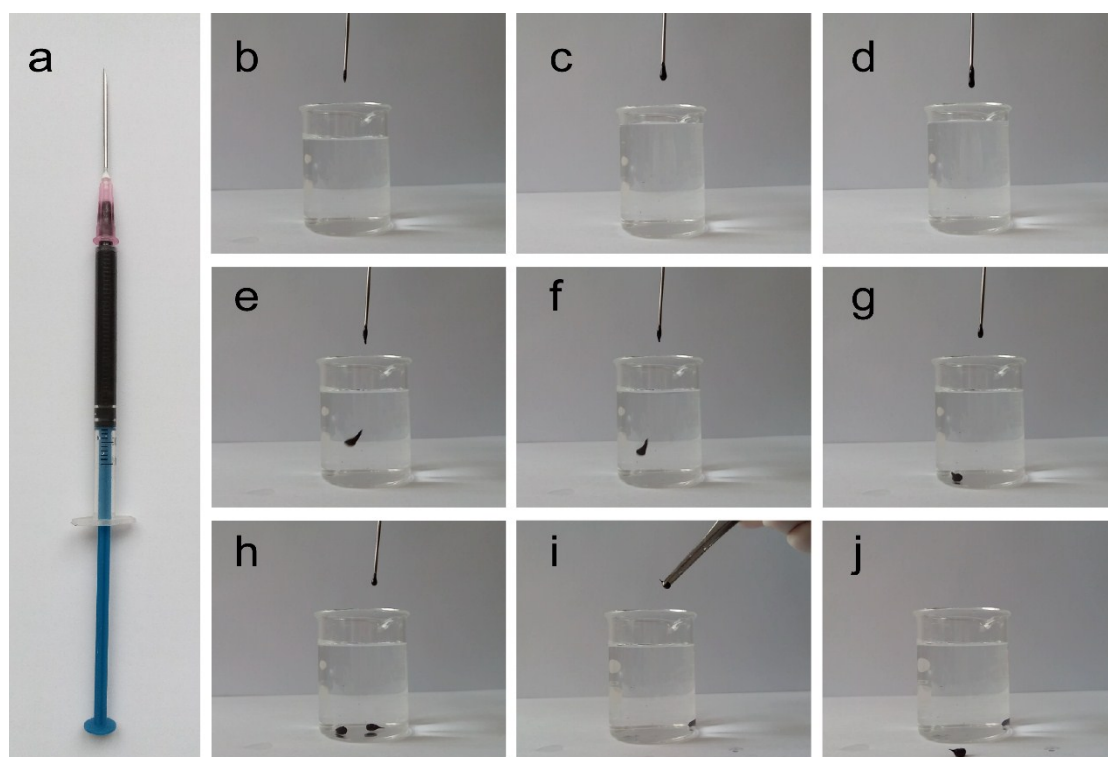

**Figure S1:** The liquid-solid phase transformation ability. (a) Photographic images of liquid implant. (b-j) Photographic images of the process of liquid-solid phase transformation; (b) before the injection; (c-d) injecting liquid PLGA-Fe<sub>3</sub>O<sub>4</sub> through a needle; (e-j) after the injection. The PLGA-Fe<sub>3</sub>O<sub>4</sub> transformed into solid implant which could be taken out by a tweezers.

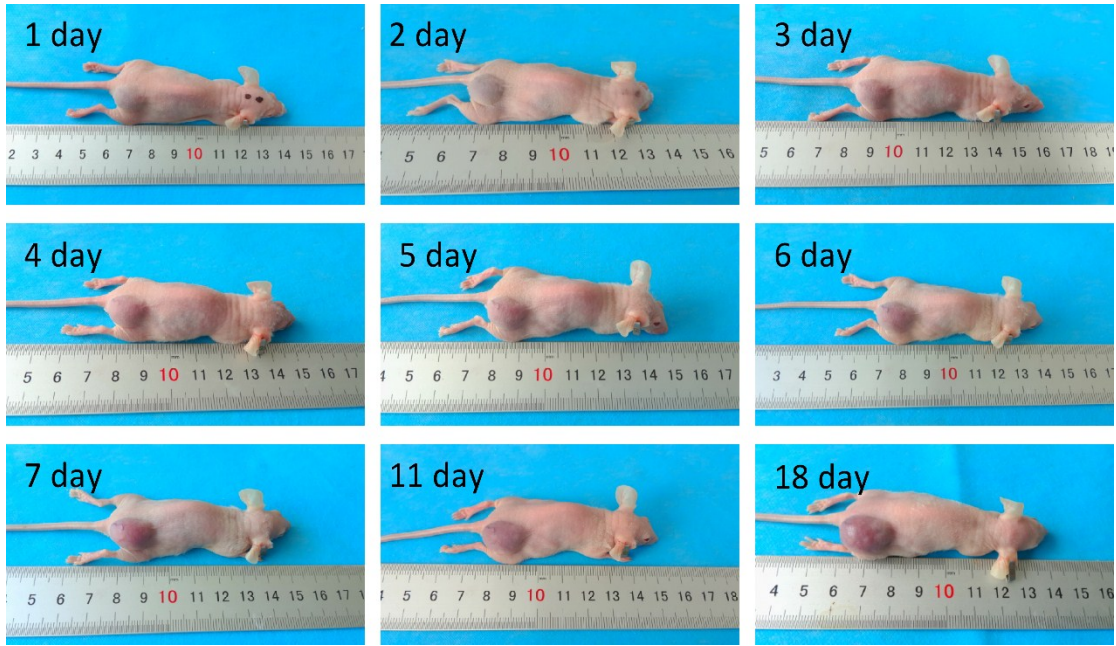

**Figure S2:** Photographic images of tumor-bearing mice in blank control group at different dates.

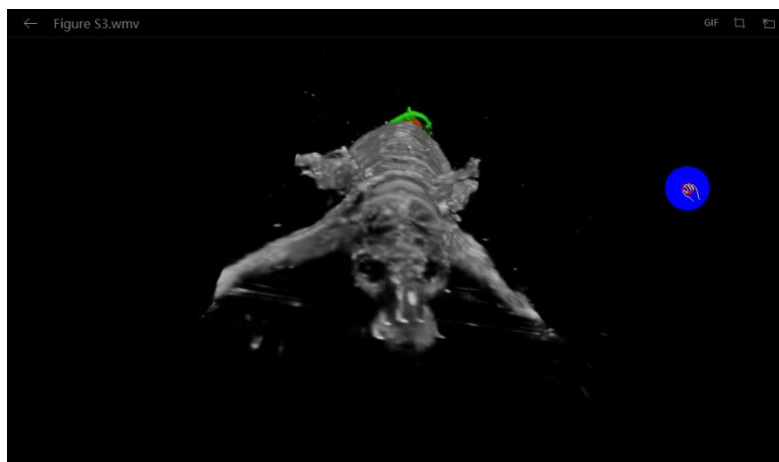

**Figure S3:** The 3D ultrasound video of implants in vivo.
